# Supplementary material for: Electronic and optical properties of a novel fluoroaluminate red phosphor Cs2NaAl3F12:Mn4+ with high color purity for white light-emitting diodes
Source: Royal Society of Chemistry journal article supplement (doi:10.1039/c9dt02577d), 2019-01-01
Supplement: c9dt02577d1.pdf [file c9dt02577d1.pdf]

## Electronic Supplementary Information (ESI)

Electronic and optical properties of a novel fluoroaluminate  
red phosphor  $\text{Cs}_2\text{NaAl}_3\text{F}_{12}:\text{Mn}^{4+}$  with high color purity for  
white light-emitting diodes

Zibo Liang,<sup>a</sup> Zhaofeng Yang,<sup>a</sup> Xiaoling Xie,<sup>a</sup> Haiqi Pu,<sup>a</sup> Dongxin Shi,<sup>a</sup> Qiang Zhou,<sup>\*a</sup> Zhengliang

Wang,<sup>a</sup> Junming Guo,<sup>a</sup> and Mingmei Wu<sup>\*b</sup>

<sup>a</sup> Key Laboratory of Green-chemistry Materials in University of Yunnan Province,  
National and Local Joint Engineering Research Center for Green Preparation  
Technology of Biobased Materials, School of Chemistry and Environment, Yunnan  
Minzu University, Kunming 650500, P. R. China.

<sup>b</sup> MOE Key Laboratory of Bioinorganic and Synthetic Chemistry, School of  
Chemistry, Sun Yat-Sen University, Guangzhou 510275, P. R. China.

**Email: [xchow123@126.com](mailto:xchow123@126.com);**

**[ceswmm@mail.sysu.edu.cn](mailto:ceswmm@mail.sysu.edu.cn).**

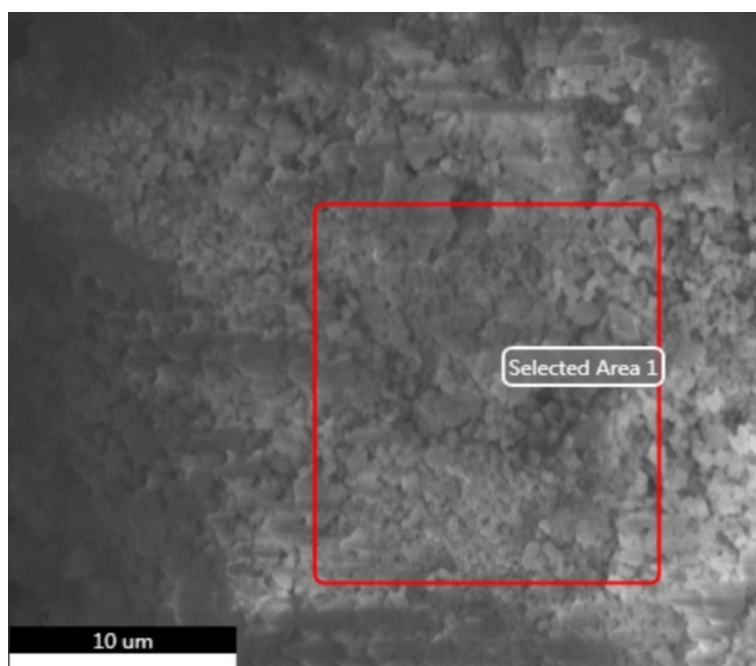

**Figure S1.** The corresponding selected area for EDS measurement from Cs<sub>2</sub>NaAl<sub>3</sub>F<sub>12</sub>:2.33%Mn<sup>4+</sup> product.

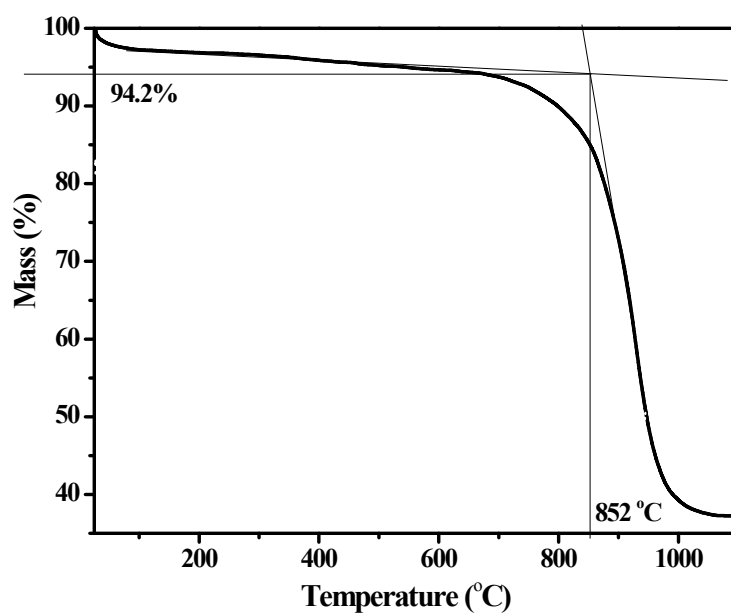

**Figure S2.** TG curve of the prepared Cs<sub>2</sub>NaAl<sub>3</sub>F<sub>12</sub>:2.33%Mn<sup>4+</sup> product.

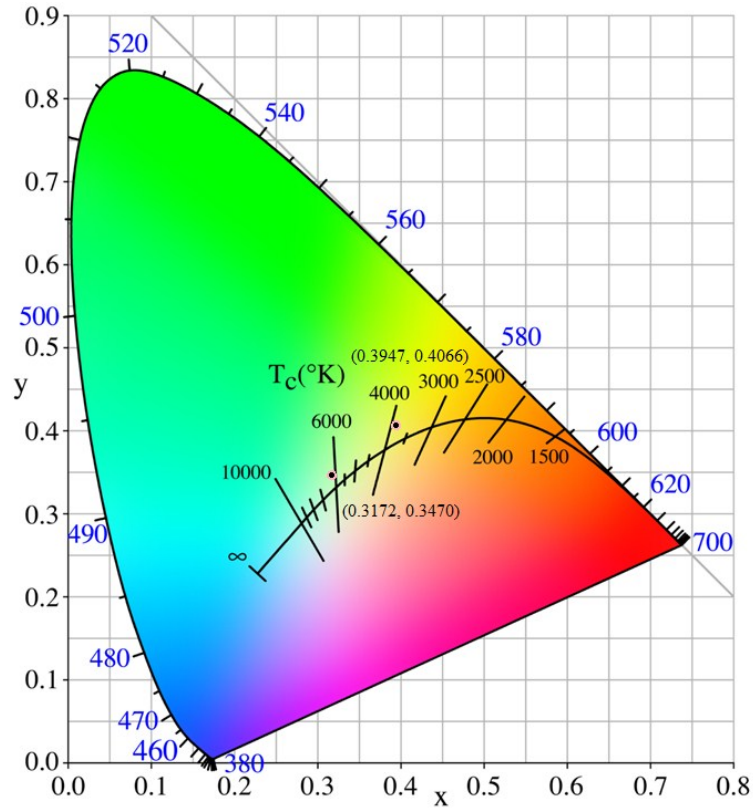

**Figure S3.** CIE chromaticity diagram for the WLEDs made of (c) YAG and (d) YAG-Cs<sub>2</sub>NaAl<sub>3</sub>F<sub>12</sub>:2.33%Mn<sup>4+</sup> mixture on GaN chip.

**Table S1.** Performance of the GaN-based WLEDs fabricated from (c) YAG and (d) YAG-Cs<sub>2</sub>NaAl<sub>3</sub>F<sub>12</sub>:2.33%Mn<sup>4+</sup> mixture at 20 mA drive current.

| No. of devices | CIE (x, y)     | CCT (K) | CRI (K) | LE (lm/W) |
|----------------|----------------|---------|---------|-----------|
| c              | 0.3172, 0.3470 | 6177    | 77.3    | 176.11    |
| d              | 0.3947, 0.4066 | 3856    | 88.7    | 78.91     |
